# Supplementary material for: The Potential of a FrameVR.io Metaverse Environment to Enhance Cognitive Engagement, Reduce Digital Burnout, and Develop Creative Writing Skills
Source: Research Square preprint supplement (doi:10.21203/rs.3.rs-8831860/v1), 2026-02-17
Supplement: Supplementary file 1 [file 003059fc7ce76d55d2215b53.xlsx]

## Sheet: Sheet1
T-TEST GROUPS=Group(1 2)
/MISSING=ANALYSIS
/VARIABLES=Dimension‎‪1‬AttentionalAllocationampCognitiveFocusinCreativeWritin Dimension‎‪2‬MetacognitiveSelfRegulationinCreativeWritingDevelopmen Dimension‎‪3‬ActiveScholarlyParticipationampCollaborativeInteractio
Dimension‎‪4‬PropensityforCreativeChallengeampMasteryOrientationinW Dimension‎‪5‬CognitiveEffortInvestmentampPersistenceinCreativeWriti ‎‫قبليCognitiveEngagement‬ Part‎‪1‬EmotionalExhaustionrelatedtoDigitalCreativeWritingWork
Part‎‪2‬CynicismDetachmentrelatedtoDigitalCreativeWritingLearning Part‎‪3‬ReducedAcademicEfficacyAccomplishmentinDigitalCreativeWriti Instrument‎‪2‬–DigitalBurnoutقبلي Originality Coherence Imagery Structure Voice Mechanics Impact ‎‫ككلقبلي‬–CreativeWritingRubric
/CRITERIA=CI(.‎‪95‬).
T-Test
Notes
Output Created		23-DEC-2025 22:35:56
Comments
Input	Active Dataset	$DataSet
	Filter	<none>
	Weight	<none>
	Split File	<none>
	N of Rows in Working Data File	70
Missing Value Handling	Definition of Missing	User defined missing values are treated as missing.
	Cases Used	Statistics for each analysis are based on the cases with no missing or out-of-range data for any variable in the analysis.
Syntax		T-TEST GROUPS=Group(1 2) /MISSING=ANALYSIS /VARIABLES=Dimension1AttentionalAllocationampCognitiveFocusinCreativeWritin Dimension2MetacognitiveSelfRegulationinCreativeWritingDevelopmen Dimension3ActiveScholarlyParticipationampCollaborativeInteractio Dimension4PropensityforCreativeChallengeampMasteryOrientationinW Dimension5CognitiveEffortInvestmentampPersistenceinCreativeWriti قبليCognitiveEngagem…
Resources	Processor Time	00:00:00.05
	Elapsed Time	00:00:00.03
Group Statistics
Group		N	Mean	Std. Deviation	Std. Error Mean
Dimension 1: Attentional Allocation &amp; Cognitive Focus in Creative Writing	control	35	17.9429	1.30481	0.220553
	expermental	35	18	0	0
Dimension 2: Metacognitive Self-Regulation in Creative Writing Development	control	35	21.3429	0.905631	0.15308
	expermental	35	21.5143	0.701739	0.118615
Dimension 3: Active Scholarly Participation &amp; Collaborative Interaction in Creative	control	35	15.4286	0.739066	0.124925
	expermental	35	15.0857	1.2455	0.210527
Dimension 4: Propensity for Creative Challenge &amp; Mastery Orientation in Writing	control	35	18.6571	1.21129	0.204746
	expermental	35	19	0	0
Dimension 5: Cognitive Effort Investment &amp; Persistence in Creative Writing	control	35	18.4286	0.654654	0.110657
	expermental	35	18.1429	0.493657	0.0834433
قبلي Cognitive Engagement	control	35	91.8	4.28952	0.725062
	expermental	35	91.7429	1.46213	0.247145
Part 1: Emotional Exhaustion related to Digital Creative Writing Work	control	35	15.8571	1.08852	0.183993
	expermental	35	15.7143	1.07297	0.181365
Part 2: Cynicism/Detachment related to Digital Creative Writing Learning	control	35	13.0571	1.18676	0.200599
	expermental	35	13.4571	1.22097	0.206381
Part 3: Reduced Academic Efficacy/Accomplishment in Digital Creative Writing	control	35	13.4	1.06274	0.179635
	expermental	35	13.5429	1.22097	0.206381
Instrument 2 – Digital Burnout قبلي	control	35	42.3143	1.92157	0.324805
	expermental	35	42.7143	2.23042	0.37701
Originality	control	35	3.48571	0.507093	0.0857143
	expermental	35	3.42857	0.502096	0.0848698
Coherence	control	35	3.88571	0.322803	0.0545636
	expermental	35	4	0	0
Imagery	control	35	2.94286	0.481594	0.0814042
	expermental	35	3	0	0
Structure	control	35	3.48571	0.507093	0.0857143
	expermental	35	3.42857	0.502096	0.0848698
Voice	control	35	3.14286	0.42997	0.0726781
	expermental	35	3	0	0
Mechanics	control	35	2.97143	0.513678	0.0868275
	expermental	35	2.94286	0.235504	0.0398075
Impact	control	35	3.48571	0.507093	0.0857143
	expermental	35	3.42857	0.502096	0.0848698
ككل قبلي – Creative Writing Rubric	control	35	23.4	1.64853	0.278652
	expermental	35	23.2286	1.5163	0.256301
Independent Samples Test
		Levene's Test for Equality of Variances		t-test for Equality of Means
		F	Sig.	t	df	Sig. (2-tailed)	Mean Difference	Std. Error Difference	95% Confidence Interval of the Difference
									Lower	Upper
Dimension 1: Attentional Allocation &amp; Cognitive Focus in Creative Writing	Equal variances assumed	66.6564	1.10216e-11	-0.259089	68	0.796349	-0.0571429	0.220553	-0.497249	0.382963
	Equal variances not assumed			-0.259089	34	0.797128	-0.0571429	0.220553	-0.50536	0.391074
Dimension 2: Metacognitive Self-Regulation in Creative Writing Development	Equal variances assumed	3.94702	0.0509857	-0.885218	68	0.379159	-0.171429	0.193657	-0.557865	0.215008
	Equal variances not assumed			-0.885218	64.0096	0.379352	-0.171429	0.193657	-0.558302	0.215444
Dimension 3: Active Scholarly Participation &amp; Collaborative Interaction in Creative	Equal variances assumed	28.8842	1.01393e-06	1.40055	68	0.165896	0.342857	0.244802	-0.145637	0.831352
	Equal variances not assumed			1.40055	55.3025	0.166935	0.342857	0.244802	-0.147677	0.833391
Dimension 4: Propensity for Creative Challenge &amp; Mastery Orientation in Writing	Equal variances assumed	181.223	7.45202e-21	-1.67455	68	0.0986159	-0.342857	0.204746	-0.751421	0.0657064
	Equal variances not assumed			-1.67455	34	0.103198	-0.342857	0.204746	-0.75895	0.073236
Dimension 5: Cognitive Effort Investment &amp; Persistence in Creative Writing	Equal variances assumed	7.56824	0.00760661	2.06155	68	0.0430757	0.285714	0.138592	0.00915868	0.56227
	Equal variances not assumed			2.06155	63.2191	0.0433676	0.285714	0.138592	0.00877948	0.562649
قبلي Cognitive Engagement	Equal variances assumed	79.9707	4.28456e-13	0.0745966	68	0.940755	0.0571429	0.766025	-1.47144	1.58572
	Equal variances not assumed			0.0745966	41.7954	0.940892	0.0571429	0.766025	-1.48898	1.60327
Part 1: Emotional Exhaustion related to Digital Creative Writing Work	Equal variances assumed	0.0250614	0.874683	0.552952	68	0.58211	0.142857	0.258354	-0.37268	0.658394
	Equal variances not assumed			0.552952	67.9859	0.58211	0.142857	0.258354	-0.372682	0.658396
Part 2: Cynicism/Detachment related to Digital Creative Writing Learning	Equal variances assumed	0.140589	0.708863	-1.38982	68	0.169118	-0.4	0.287807	-0.974311	0.174311
	Equal variances not assumed			-1.38982	67.9452	0.169121	-0.4	0.287807	-0.974319	0.174319
Part 3: Reduced Academic Efficacy/Accomplishment in Digital Creative Writing	Equal variances assumed	0.504118	0.480124	-0.522121	68	0.603283	-0.142857	0.273609	-0.688836	0.403121
	Equal variances not assumed			-0.522121	66.7309	0.603315	-0.142857	0.273609	-0.689024	0.403309
Instrument 2 – Digital Burnout قبلي	Equal variances assumed	0.0884316	0.767087	-0.803811	68	0.424307	-0.4	0.497629	-1.393	0.593004
	Equal variances not assumed			-0.803811	66.5433	0.424368	-0.4	0.497629	-1.3934	0.593398
Originality	Equal variances assumed	0.62721	0.431135	0.473732	68	0.637208	0.0571429	0.120623	-0.183556	0.297842
	Equal variances not assumed			0.473732	67.9933	0.637208	0.0571429	0.120623	-0.183556	0.297842
Coherence	Equal variances assumed	23.1331	8.73894e-06	-2.09454	68	0.0399407	-0.114286	0.0545636	-0.223166	-0.00540566
	Equal variances not assumed			-2.09454	34	0.0437378	-0.114286	0.0545636	-0.225172	-0.00339906
Imagery	Equal variances assumed	16.1545	0.000148617	-0.701964	68	0.485097	-0.0571429	0.0814042	-0.219582	0.105297
	Equal variances not assumed			-0.701964	34	0.487479	-0.0571429	0.0814042	-0.222576	0.10829
Structure	Equal variances assumed	0.62721	0.431135	0.473732	68	0.637208	0.0571429	0.120623	-0.183556	0.297842
	Equal variances not assumed			0.473732	67.9933	0.637208	0.0571429	0.120623	-0.183556	0.297842
Voice	Equal variances assumed	31.4968	3.99154e-07	1.96561	68	0.0534287	0.142857	0.0726781	-0.00216984	0.287884
	Equal variances not assumed			1.96561	34	0.0575537	0.142857	0.0726781	-0.00484262	0.290557
Mechanics	Equal variances assumed	4.42431	0.0391327	0.299122	68	0.76576	0.0285714	0.0955178	-0.162031	0.219174
	Equal variances not assumed			0.299122	47.6882	0.766147	0.0285714	0.0955178	-0.163512	0.220655
Impact	Equal variances assumed	0.62721	0.431135	0.473732	68	0.637208	0.0571429	0.120623	-0.183556	0.297842
	Equal variances not assumed			0.473732	67.9933	0.637208	0.0571429	0.120623	-0.183556	0.297842
ككل قبلي – Creative Writing Rubric	Equal variances assumed	0.088284	0.767276	0.452797	68	0.652136	0.171429	0.378599	-0.584054	0.926911
	Equal variances not assumed			0.452797	67.5301	0.652146	0.171429	0.378599	-0.58415	0.927007
