# Supplementary material for: The Potential of a FrameVR.io Metaverse Environment to Enhance Cognitive Engagement, Reduce Digital Burnout, and Develop Creative Writing Skills
Source: Research Square preprint supplement (doi:10.21203/rs.3.rs-8831860/v1), 2026-02-17
Supplement: Supplementary file 2 [file 31f31da9472ab1b1ffe38dad.xlsx]

## Sheet: Sheet1
T-TEST PAIRS=Dimension1AttentionalAllocationampCognitiveFocusinCreativeWritin Dimension2MetacognitiveSelfRegulationinCreativeWritingDevelopmen Dimension3ActiveScholarlyParticipationampCollaborativeInteractio
Dimension‎‪4‬PropensityforCreativeChallengeampMasteryOrientationinW Dimension‎‪5‬CognitiveEffortInvestmentampPersistenceinCreativeWriti ‎‫قبليCognitiveEngagement‬ Part‎‪1‬EmotionalExhaustionrelatedtoDigitalCreativeWritingWork
Part‎‪2‬CynicismDetachmentrelatedtoDigitalCreativeWritingLearning Part‎‪3‬ReducedAcademicEfficacyAccomplishmentinDigitalCreativeWriti Instrument‎‪2‬–DigitalBurnoutقبلي Originality Coherence Imagery Structure Voice Mechanics Impact ‎‫ككلقبلي‬–CreativeWritingRubric
WITH Dimension‎‪1‬AttentionalAllocationampCognitiveFocusinCreativeWrit_A Dimension‎‪2‬MetacognitiveSelfRegulationinCreativeWritingDevelopm_A Dimension‎‪3‬ActiveScholarlyParticipationampCollaborativeInteract_A
Dimension‎‪4‬PropensityforCreativeChallengeampMasteryOrientationi_A Dimension‎‪5‬CognitiveEffortInvestmentampPersistenceinCreativeWri_A ‎‫بعديCognitiveEngagement‬ Part‎‪1‬EmotionalExhaustionrelatedtoDigitalCreativeWritingWork_A
Part‎‪2‬CynicismDetachmentrelatedtoDigitalCreativeWritingLearning_A Part‎‪3‬ReducedAcademicEfficacyAccomplishmentinDigitalCreativeWri_A Instrument‎‪2‬–DigitalBurnoutبعدي Originality_A Coherence_A Imagery_A Structure_A Voice_A Mechanics_A Impact_A
‎‫ككلبعدي‬–CreativeWritingRubric (PAIRED)
/CRITERIA=CI(.‎‪9500‬)
/MISSING=ANALYSIS.
T-Test
Notes
Output Created		23-DEC-2025 22:40:46
Comments
Input	Active Dataset	$DataSet
	Filter	<none>
	Weight	<none>
	Split File	<none>
	N of Rows in Working Data File	35
Missing Value Handling	Definition of Missing	User defined missing values are treated as missing.
	Cases Used	Statistics for each analysis are based on the cases with no missing or out-of-range data for any variable in the analysis.
Syntax		T-TEST PAIRS=Dimension1AttentionalAllocationampCognitiveFocusinCreativeWritin Dimension2MetacognitiveSelfRegulationinCreativeWritingDevelopmen Dimension3ActiveScholarlyParticipationampCollaborativeInteractio Dimension4PropensityforCreativeChallengeampMasteryOrientationinW Dimension5CognitiveEffortInvestmentampPersistenceinCreativeWriti قبليCognitiveEngagement Part1EmotionalExhaustionrelatedtoDigi…
Resources	Processor Time	00:00:00.03
	Elapsed Time	00:00:00.02
Paired Samples Statistics
		Mean	N	Std. Deviation	Std. Error Mean
Pair 1	Dimension 1: Attentional Allocation &amp; Cognitive Focus in Creative Writing	18	35	0	0
	Dimension 1: Attentional Allocation &amp; Cognitive Focus in Creative Writing	26.2571	35	0.44344	0.074955
Pair 2	Dimension 2: Metacognitive Self-Regulation in Creative Writing Development	21.5143	35	0.701739	0.118615
	Dimension 2: Metacognitive Self-Regulation in Creative Writing Development	29.7429	35	0.44344	0.074955
Pair 3	Dimension 3: Active Scholarly Participation &amp; Collaborative Interaction in Creative	15.0857	35	1.2455	0.210527
	Dimension 3: Active Scholarly Participation &amp; Collaborative Interaction in Creative	21.7429	35	0.44344	0.074955
Pair 4	Dimension 4: Propensity for Creative Challenge &amp; Mastery Orientation in Writing	19	35	0	0
	Dimension 4: Propensity for Creative Challenge &amp; Mastery Orientation in Writing	25.7429	35	0.44344	0.074955
Pair 5	Dimension 5: Cognitive Effort Investment &amp; Persistence in Creative Writing	18.1429	35	0.493657	0.0834433
	Dimension 5: Cognitive Effort Investment &amp; Persistence in Creative Writing	25.3714	35	2.55626	0.432086
Pair 6	قبلي Cognitive Engagement	91.7429	35	1.46213	0.247145
	بعدي Cognitive Engagement	128.857	35	3.2189	0.544094
Pair 7	Part 1: Emotional Exhaustion related to Digital Creative Writing Work	15.7143	35	1.07297	0.181365
	Part 1: Emotional Exhaustion related to Digital Creative Writing Work	9	35	0	0
Pair 8	Part 2: Cynicism/Detachment related to Digital Creative Writing Learning	13.4571	35	1.22097	0.206381
	Part 2: Cynicism/Detachment related to Digital Creative Writing Learning	8	35	0	0
Pair 9	Part 3: Reduced Academic Efficacy/Accomplishment in Digital Creative Writing	13.5429	35	1.22097	0.206381
	Part 3: Reduced Academic Efficacy/Accomplishment in Digital Creative Writing	8.37143	35	0.490241	0.0828658
Pair 10	Instrument 2 – Digital Burnout قبلي	42.7143	35	2.23042	0.37701
	Instrument 2 – Digital Burnout بعدي	25.3714	35	0.490241	0.0828658
Pair 11	Originality	3.42857	35	0.502096	0.0848698
	Originality	4.6	35	0.49705	0.0840168
Pair 12	Coherence	4.000a	35	0	0
	Coherence	4.000a	35	0	0
Pair 13	Imagery	3.000a	35	0	0
	Imagery	5.000a	35	0	0
Pair 14	Structure	3.42857	35	0.502096	0.0848698
	Structure	4.6	35	0.49705	0.0840168
Pair 15	Voice	3.000a	35	0	0
	Voice	4.000a	35	0	0
Pair 16	Mechanics	2.94286	35	0.235504	0.0398075
	Mechanics	5	35	0	0
Pair 17	Impact	3.42857	35	0.502096	0.0848698
	Impact	4.6	35	0.49705	0.0840168
Pair 18	ككل قبلي – Creative Writing Rubric	23.2286	35	1.5163	0.256301
	ككل بعدي – Creative Writing Rubric	31.8	35	1.49115	0.25205
a. The correlation and t cannot be computed because the standard error of the difference is 0.
Paired Samples Correlations
		N	Correlation	Sig.
Pair 1	Dimension 1: Attentional Allocation &amp; Cognitive Focus in Creative Writing & Dimension 1: Attentional Allocation &amp; Cognitive Focus in Creative Writing	35
Pair 2	Dimension 2: Metacognitive Self-Regulation in Creative Writing Development & Dimension 2: Metacognitive Self-Regulation in Creative Writing Development	35	0.153928	0.377313
Pair 3	Dimension 3: Active Scholarly Participation &amp; Collaborative Interaction in Creative & Dimension 3: Active Scholarly Participation &amp; Collaborative Interaction in Creative	35	-0.225184	0.193394
Pair 4	Dimension 4: Propensity for Creative Challenge &amp; Mastery Orientation in Writing & Dimension 4: Propensity for Creative Challenge &amp; Mastery Orientation in Writing	35
Pair 5	Dimension 5: Cognitive Effort Investment &amp; Persistence in Creative Writing & Dimension 5: Cognitive Effort Investment &amp; Persistence in Creative Writing	35	-0.159821	0.359096
Pair 6	قبلي Cognitive Engagement & بعدي Cognitive Engagement	35	-0.126771	0.468033
Pair 7	Part 1: Emotional Exhaustion related to Digital Creative Writing Work & Part 1: Emotional Exhaustion related to Digital Creative Writing Work	35
Pair 8	Part 2: Cynicism/Detachment related to Digital Creative Writing Learning & Part 2: Cynicism/Detachment related to Digital Creative Writing Learning	35
Pair 9	Part 3: Reduced Academic Efficacy/Accomplishment in Digital Creative Writing & Part 3: Reduced Academic Efficacy/Accomplishment in Digital Creative Writing	35	-0.00280783	0.987228
Pair 10	Instrument 2 – Digital Burnout قبلي & Instrument 2 – Digital Burnout بعدي	35	-0.0345835	0.84365
Pair 11	Originality & Originality	35	0.353553	0.0372045
Pair 14	Structure & Structure	35	0.353553	0.0372045
Pair 16	Mechanics & Mechanics	35
Pair 17	Impact & Impact	35	0.353553	0.0372045
Pair 18	ككل قبلي – Creative Writing Rubric & ككل بعدي – Creative Writing Rubric	35	0.359025	0.0341691
Paired Samples Test
		Paired Differences					t	df	Sig. (2-tailed)
		Mean	Std. Deviation	Std. Error Mean	95% Confidence Interval of the Difference
					Lower	Upper
Pair 1	Dimension 1: Attentional Allocation &amp; Cognitive Focus in Creative Writing - Dimension 1: Attentional Allocation &amp; Cognitive Focus in Creative Writing	-8.25714	0.44344	0.074955	-8.40947	-8.10482	-110.161	34	5.23683e-45
Pair 2	Dimension 2: Metacognitive Self-Regulation in Creative Writing Development - Dimension 2: Metacognitive Self-Regulation in Creative Writing Development	-8.22857	0.770245	0.130195	-8.49316	-7.96398	-63.2018	34	7.62965e-37
Pair 3	Dimension 3: Active Scholarly Participation &amp; Collaborative Interaction in Creative - Dimension 3: Active Scholarly Participation &amp; Collaborative Interaction in Creative	-6.65714	1.41302	0.238845	-7.14253	-6.17175	-27.8723	34	5.30663e-25
Pair 4	Dimension 4: Propensity for Creative Challenge &amp; Mastery Orientation in Writing - Dimension 4: Propensity for Creative Challenge &amp; Mastery Orientation in Writing	-6.74286	0.44344	0.074955	-6.89518	-6.59053	-89.9588	34	5.01851e-42
Pair 5	Dimension 5: Cognitive Effort Investment &amp; Persistence in Creative Writing - Dimension 5: Cognitive Effort Investment &amp; Persistence in Creative Writing	-7.22857	2.67983	0.452975	-8.14913	-6.30802	-15.958	34	2.32942e-17
Pair 6	قبلي Cognitive Engagement - بعدي Cognitive Engagement	-37.1143	3.70033	0.62547	-38.3854	-35.8432	-59.3383	34	6.39422e-36
Pair 7	Part 1: Emotional Exhaustion related to Digital Creative Writing Work - Part 1: Emotional Exhaustion related to Digital Creative Writing Work	6.71429	1.07297	0.181365	6.34571	7.08286	37.0209	34	4.62437e-29
Pair 8	Part 2: Cynicism/Detachment related to Digital Creative Writing Learning - Part 2: Cynicism/Detachment related to Digital Creative Writing Learning	5.45714	1.22097	0.206381	5.03773	5.87656	26.4421	34	2.94609e-24
Pair 9	Part 3: Reduced Academic Efficacy/Accomplishment in Digital Creative Writing - Part 3: Reduced Academic Efficacy/Accomplishment in Digital Creative Writing	5.17143	1.31699	0.222611	4.71903	5.62383	23.2307	34	1.92058e-22
Pair 10	Instrument 2 – Digital Burnout قبلي - Instrument 2 – Digital Burnout بعدي	17.3429	2.30016	0.388799	16.5527	18.133	44.6063	34	9.26983e-32
Pair 11	Originality - Originality	-1.17143	0.568057	0.0960192	-1.36656	-0.976294	-12.1999	34	5.68798e-14
Pair 14	Structure - Structure	-1.17143	0.568057	0.0960192	-1.36656	-0.976294	-12.1999	34	5.68798e-14
Pair 16	Mechanics - Mechanics	-2.05714	0.235504	0.0398075	-2.13804	-1.97624	-51.6773	34	6.6856e-34
Pair 17	Impact - Impact	-1.17143	0.568057	0.0960192	-1.36656	-0.976294	-12.1999	34	5.68798e-14
Pair 18	ككل قبلي – Creative Writing Rubric - ككل بعدي – Creative Writing Rubric	-8.57143	1.70269	0.287807	-9.15632	-7.98653	-29.7818	34	6.07843e-26
