# Supplementary material for: The Potential of a FrameVR.io Metaverse Environment to Enhance Cognitive Engagement, Reduce Digital Burnout, and Develop Creative Writing Skills
Source: Research Square preprint supplement (doi:10.21203/rs.3.rs-8831860/v1), 2026-02-17
Supplement: Supplementary file 3 [file 4d9023e099928dbdaac30119.xlsx]

## Sheet: Sheet1
T-TEST GROUPS=Group(1 2)
/MISSING=ANALYSIS
/VARIABLES=Dimension‎‪1‬AttentionalAllocationampCognitiveFocusinCreativeWrit_A Dimension‎‪2‬MetacognitiveSelfRegulationinCreativeWritingDevelopm_A Dimension‎‪3‬ActiveScholarlyParticipationampCollaborativeInteract_A
Dimension‎‪4‬PropensityforCreativeChallengeampMasteryOrientationi_A Dimension‎‪5‬CognitiveEffortInvestmentampPersistenceinCreativeWri_A ‎‫بعديCognitiveEngagement‬ Part‎‪1‬EmotionalExhaustionrelatedtoDigitalCreativeWritingWork_A
Part‎‪2‬CynicismDetachmentrelatedtoDigitalCreativeWritingLearning_A Part‎‪3‬ReducedAcademicEfficacyAccomplishmentinDigitalCreativeWri_A Instrument‎‪2‬–DigitalBurnoutبعدي Originality_A Coherence_A Imagery_A Structure_A Voice_A Mechanics_A Impact_A
‎‫ككلبعدي‬–CreativeWritingRubric
/CRITERIA=CI(.‎‪95‬).
T-Test
Notes
Output Created		23-DEC-2025 22:37:34
Comments
Input	Active Dataset	$DataSet
	Filter	<none>
	Weight	<none>
	Split File	<none>
	N of Rows in Working Data File	70
Missing Value Handling	Definition of Missing	User defined missing values are treated as missing.
	Cases Used	Statistics for each analysis are based on the cases with no missing or out-of-range data for any variable in the analysis.
Syntax		T-TEST GROUPS=Group(1 2) /MISSING=ANALYSIS /VARIABLES=Dimension1AttentionalAllocationampCognitiveFocusinCreativeWrit_A Dimension2MetacognitiveSelfRegulationinCreativeWritingDevelopm_A Dimension3ActiveScholarlyParticipationampCollaborativeInteract_A Dimension4PropensityforCreativeChallengeampMasteryOrientationi_A Dimension5CognitiveEffortInvestmentampPersistenceinCreativeWri_A بعديCognitiveEngagem…
Resources	Processor Time	00:00:00.02
	Elapsed Time	00:00:00.01
Group Statistics
Group		N	Mean	Std. Deviation	Std. Error Mean
Dimension 1: Attentional Allocation &amp; Cognitive Focus in Creative Writing	control	35	19.4857	0.507093	0.0857143
	expermental	35	26.2571	0.44344	0.074955
Dimension 2: Metacognitive Self-Regulation in Creative Writing Development	control	35	23.0286	0.169031	0.0285714
	expermental	35	29.7429	0.44344	0.074955
Dimension 3: Active Scholarly Participation &amp; Collaborative Interaction in Creative	control	35	16.5714	0.557606	0.0942526
	expermental	35	21.7429	0.44344	0.074955
Dimension 4: Propensity for Creative Challenge &amp; Mastery Orientation in Writing	control	35	20.5143	0.507093	0.0857143
	expermental	35	25.7429	0.44344	0.074955
Dimension 5: Cognitive Effort Investment &amp; Persistence in Creative Writing	control	35	20.9143	3.04256	0.514286
	expermental	35	25.3714	2.55626	0.432086
بعدي Cognitive Engagement	control	35	100.514	4.47458	0.756342
	expermental	35	128.857	3.2189	0.544094
Part 1: Emotional Exhaustion related to Digital Creative Writing Work	control	35	18.6	2.9823	0.504101
	expermental	35	9	0	0
Part 2: Cynicism/Detachment related to Digital Creative Writing Learning	control	35	15.6	2.9823	0.504101
	expermental	35	8	0	0
Part 3: Reduced Academic Efficacy/Accomplishment in Digital Creative Writing	control	35	15.6857	3.38484	0.572142
	expermental	35	8.37143	0.490241	0.0828658
Instrument 2 – Digital Burnout بعدي	control	35	49.8857	9.32666	1.57649
	expermental	35	25.3714	0.490241	0.0828658
Originality	control	35	3.51429	0.562109	0.0950137
	expermental	35	4.6	0.49705	0.0840168
Coherence	control	35	4	.0000a	0
	expermental	35	4	.0000a	0
Imagery	control	35	3.05714	0.338062	0.0571429
	expermental	35	5	0	0
Structure	control	35	3.51429	0.562109	0.0950137
	expermental	35	4.6	0.49705	0.0840168
Voice	control	35	3	.0000a	0
	expermental	35	4	.0000a	0
Mechanics	control	35	3.05714	0.338062	0.0571429
	expermental	35	5	0	0
Impact	control	35	3.51429	0.562109	0.0950137
	expermental	35	4.6	0.49705	0.0840168
ككل بعدي – Creative Writing Rubric	control	35	23.6571	2.08556	0.352525
	expermental	35	31.8	1.49115	0.25205
a. t cannot be computed because the standard deviations of both groups are 0.
Independent Samples Test
		Levene's Test for Equality of Variances		t-test for Equality of Means
		F	Sig.	t	df	Sig. (2-tailed)	Mean Difference	Std. Error Difference	95% Confidence Interval of the Difference
									Lower	Upper
Dimension 1: Attentional Allocation &amp; Cognitive Focus in Creative Writing	Equal variances assumed	10.3784	0.00195765	-59.469	68	2.293e-60	-6.77143	0.113865	-6.99864	-6.54421
	Equal variances not assumed			-59.469	66.8122	1.3719e-59	-6.77143	0.113865	-6.99872	-6.54414
Dimension 2: Metacognitive Self-Regulation in Creative Writing Development	Equal variances assumed	51.9818	5.93366e-10	-83.7028	68	2.52633e-70	-6.71429	0.0802158	-6.87435	-6.55422
	Equal variances not assumed			-83.7028	43.6761	7.3057e-50	-6.71429	0.0802158	-6.87598	-6.55259
Dimension 3: Active Scholarly Participation &amp; Collaborative Interaction in Creative	Equal variances assumed	9.03929	0.00370013	-42.9437	68	5.31111e-51	-5.17143	0.120423	-5.41173	-4.93113
	Equal variances not assumed			-42.9437	64.7188	2.76591e-49	-5.17143	0.120423	-5.41195	-4.93091
Dimension 4: Propensity for Creative Challenge &amp; Mastery Orientation in Writing	Equal variances assumed	10.3784	0.00195765	-45.9191	68	6.48392e-53	-5.22857	0.113865	-5.45579	-5.00136
	Equal variances not assumed			-45.9191	66.8122	2.89558e-52	-5.22857	0.113865	-5.45586	-5.00128
Dimension 5: Cognitive Effort Investment &amp; Persistence in Creative Writing	Equal variances assumed	14.0722	0.000366045	-6.63556	68	6.39165e-09	-4.45714	0.671706	-5.79751	-3.11678
	Equal variances not assumed			-6.63556	66.037	7.15078e-09	-4.45714	0.671706	-5.79823	-3.11605
بعدي Cognitive Engagement	Equal variances assumed	27.3299	1.78896e-06	-30.4201	68	2.52554e-41	-28.3429	0.931714	-30.2021	-26.4837
	Equal variances not assumed			-30.4201	61.7567	7.08463e-39	-28.3429	0.931714	-30.2055	-26.4802
Part 1: Emotional Exhaustion related to Digital Creative Writing Work	Equal variances assumed	816	1.33931e-39	19.0438	68	5.81768e-29	9.6	0.504101	8.59408	10.6059
	Equal variances not assumed			19.0438	34	1.03097e-19	9.6	0.504101	8.57554	10.6245
Part 2: Cynicism/Detachment related to Digital Creative Writing Learning	Equal variances assumed	816	1.33931e-39	15.0763	68	2.26786e-23	7.6	0.504101	6.59408	8.60592
	Equal variances not assumed			15.0763	34	1.27458e-16	7.6	0.504101	6.57554	8.62446
Part 3: Reduced Academic Efficacy/Accomplishment in Digital Creative Writing	Equal variances assumed	380.321	1.47901e-29	12.652	68	1.54569e-19	7.31429	0.578112	6.16068	8.46789
	Equal variances not assumed			12.652	35.4258	1.05977e-14	7.31429	0.578112	6.14116	8.48741
Instrument 2 – Digital Burnout بعدي	Equal variances assumed	683.062	3.43888e-37	15.5284	68	4.74979e-24	24.5143	1.57867	21.3641	27.6645
	Equal variances not assumed			15.5284	34.1879	4.70324e-17	24.5143	1.57867	21.3067	27.7219
Originality	Equal variances assumed	2.22133	0.14074	-8.56023	68	2.10798e-12	-1.08571	0.126832	-1.3388	-0.832624
	Equal variances not assumed			-8.56023	66.9965	2.35655e-12	-1.08571	0.126832	-1.33887	-0.832556
Imagery	Equal variances assumed	4.2461	0.0431688	-34	68	2.0743e-44	-1.94286	0.0571429	-2.05688	-1.82883
	Equal variances not assumed			-34	34	7.75874e-28	-1.94286	0.0571429	-2.05899	-1.82673
Structure	Equal variances assumed	2.22133	0.14074	-8.56023	68	2.10798e-12	-1.08571	0.126832	-1.3388	-0.832624
	Equal variances not assumed			-8.56023	66.9965	2.35655e-12	-1.08571	0.126832	-1.33887	-0.832556
Mechanics	Equal variances assumed	4.2461	0.0431688	-34	68	2.0743e-44	-1.94286	0.0571429	-2.05688	-1.82883
	Equal variances not assumed			-34	34	7.75874e-28	-1.94286	0.0571429	-2.05899	-1.82673
Impact	Equal variances assumed	2.22133	0.14074	-8.56023	68	2.10798e-12	-1.08571	0.126832	-1.3388	-0.832624
	Equal variances not assumed			-8.56023	66.9965	2.35655e-12	-1.08571	0.126832	-1.33887	-0.832556
ككل بعدي – Creative Writing Rubric	Equal variances assumed	1.69115	0.19784	-18.7899	68	1.25514e-28	-8.14286	0.433363	-9.00762	-7.2781
	Equal variances not assumed			-18.7899	61.5598	3.488e-27	-8.14286	0.433363	-9.00926	-7.27645
