# Supplementary material for: The Potential of a FrameVR.io Metaverse Environment to Enhance Cognitive Engagement, Reduce Digital Burnout, and Develop Creative Writing Skills
Source: Research Square preprint supplement (doi:10.21203/rs.3.rs-8831860/v1), 2026-02-17
Supplement: Supplementary file 5 [file d658aaae5faa2aa59a7aba39.docx]

**Instrument I: Scale of Cognitive Engagement in English Creative Writing**

**Instructions:**

The following items are designed to assess varying dimensions of cognitive engagement among students within the context of their English language studies, specifically as they pertain to the development of creative writing competencies. You are to indicate your levels of agreement with each statement reflecting your typical experiences and behaviors in this academic domain. Your responses should be recorded on the provided 5-point Likert-type scale.

**Response Scale:**
1 = Strongly Disagree (SD); 2 = Disagree (D); 3 = Neither Agree nor Disagree (N); 4 = Agree (A); 5 = Strongly Agree (SA)

**Dimension 1: Attentional Allocation & Cognitive Focus in Creative Writing**

*The extent to which you direct and sustain your cognitive resources towards instructional stimuli and tasks related to creative writing.*

| **No.** | **Statement** | **SD** | **D** | **N** | **A** | **SA** |
| --- | --- | --- | --- | --- | --- | --- |
| 1.1 | I am able to sustain concentration and effectively process instructional content pertinent to creative writing principles and literary techniques. |  |  |  |  |  |
| 1.2 | I engage in deep cognitive processing to achieve comprehensive understanding of novel narrative structures and stylistic elements presented. |  |  |  |  |  |
| 1.3 | My cognitive efforts are directed towards discerning superordinate themes and key literary devices during creative writing instruction. |  |  |  |  |  |
| 1.4 | I generally achieve a high level of comprehension regarding pedagogical explanations of creative writing concepts proffered by the instructor. |  |  |  |  |  |
| 1.5 | There is an immediate impetus to engage with writing exercises subsequent to the acquisition of new knowledge about creative composition. |  |  |  |  |  |
| 1.6 | I endeavor to elucidate the relational architecture between disparate literary terms and creative writing strategies. |  |  |  |  |  |

**Dimension 2: Metacognitive Self-Regulation in Creative Writing Development**
*The processes by which you strategically manage and monitor your own learning and application of creative writing skills, including goal setting, planning, and self-assessment.*

| **No.** | **Statement** | **SD** | **D** | **N** | **A** | **SA** |
| --- | --- | --- | --- | --- | --- | --- |
| 2.1 | I establish clearly defined objectives for enhancing my creative writing abilities. |  |  |  |  |  |
| 2.2 | I employ effective temporal management strategies to ensure dedicated periods for creative writing practice and task completion. |  |  |  |  |  |
| 2.3 | I consciously integrate newly acquired literary knowledge and writing techniques with my pre-existing understanding of narrative and expression. |  |  |  |  |  |
| 2.4 | I engage in ongoing metacognitive monitoring of my creative writing development and the efficacy of my compositional choices. |  |  |  |  |  |
| 2.5 | I systematically evaluate my acquisition of both declarative knowledge of literary theory and procedural skills in creative composition. |  |  |  |  |  |
| 2.6 | I actively seek supplementary literary examples or critical analyses to augment my understanding and achieve greater depth in my writing. |  |  |  |  |  |
| 2.7 | I endeavor to innovate personal writing styles and approaches tailored to my idiosyncratic creative predispositions and authorial voice. |  |  |  |  |  |

**Dimension 3: Active Scholarly Participation & Collaborative Interaction in Creative Writing**

*The degree of your active involvement in learning activities, literary discourse, and collaborative writing tasks.*

| **No.** | **Statement** | **SD** | **D** | **N** | **A** | **SA** |
| --- | --- | --- | --- | --- | --- | --- |
| 3.1 | My engagement in creative writing activities is heightened by the intellectually stimulating and expressive nature of the tasks. |  |  |  |  |  |
| 3.2 | I proactively articulate inquiries concerning ambiguities in literary concepts or challenges in applying creative writing techniques. |  |  |  |  |  |
| 3.3 | I exhibit a pronounced proclivity for engaging in constructive peer feedback and collaborative story development during writing workshops. |  |  |  |  |  |
| 3.4 | Prior to undertaking new creative writing assignments, I systematically review previously consolidated literary notes and exemplary texts. |  |  |  |  |  |
| 3.5 | I consistently achieve timely completion of creative writing assignments within the stipulated temporal parameters. |  |  |  |  |  |

**Dimension 4: Propensity for Creative Challenge & Mastery Orientation in Writing**
*Your inclinations to seek out, engage with, and persist in creatively challenging writing tasks, often driven by a desire for expressive competence and literary mastery.*

| **No.** | **Statement** | **SD** | **D** | **N** | **A** | **SA** |
| --- | --- | --- | --- | --- | --- | --- |
| 4.1 | I exert maximal creative effort when confronted with writing prompts that are complex or demand innovative narrative solutions. |  |  |  |  |  |
| 4.2 | A sense of authorial achievement and pride accompanies instances of successfully crafting compelling narratives or complex literary pieces. |  |  |  |  |  |
| 4.3 | I exhibit a preference for engaging in challenging writing endeavors that push the boundaries of my current creative capabilities. |  |  |  |  |  |
| 4.4 | I possess a strong desideratum to achieve impactful and well-crafted outcomes in all creative writing scenarios encountered. |  |  |  |  |  |
| 4.5 | I am assiduously committed to attaining a high standard of proficiency and artistry in my creative writing. |  |  |  |  |  |
| 4.6 | I conceptualize compositional difficulties not as deterrents, but as catalysts that reinforce my volitional commitment to creative excellence. |  |  |  |  |  |

**Dimension 5: Cognitive Effort Investment & Persistence in Creative Writing**
*The amount of mental work and perseverance you dedicate to understanding literary concepts and applying them in your creative writing.*

| **No.** | **Statement** | **SD** | **D** | **N** | **A** | **SA** |
| --- | --- | --- | --- | --- | --- | --- |
| 5.1 | I allocate substantial cognitive resources towards the understanding and effective utilization of literary devices and narrative techniques. |  |  |  |  |  |
| 5.2 | I engage in the systematic planning and revision of my creative writing pieces to enhance their quality and impact. |  |  |  |  |  |
| 5.3 | A profound sense of gratification is experienced upon successful articulation of complex ideas or emotions through creative writing. |  |  |  |  |  |
| 5.4 | My capacity for creative expression and literary learning remains robust irrespective of the perceived complexity of the writing task. |  |  |  |  |  |
| 5.5 | I consistently demonstrate proficiency in the execution and completion of assigned creative writing tasks to a satisfactory standard. |  |  |  |  |  |
| 5.6 | Each creative writing session is perceived as an opportunity for developing my authorial voice and progressing towards my literary goals. |  |  |  |  |  |

**Instrument 2: Digital Burnout Scale (Adapted for Creative Writing Context)**

**Instructions for Students:**

The following statements relate to your feelings and experiences with using digital tools and platforms for your English creative writing courses and activities. Please indicate how often you have felt this way during the current academic period. There are no right or wrong answers.

Please use the following scale to record your answers:
1 = Never
2 = Rarely (A few times a year or less)
3 = Sometimes (Once a month or less)
4 = Often (A few times a month)
5 = Very Often (Once a week or more)
6 = Always (Every day)

**Part 1: Emotional Exhaustion related to Digital Creative Writing Work**

| No. | Statement | Never | Rarely | Sometimes | Often | Very Often | Always |
| --- | --- | --- | --- | --- | --- | --- | --- |
| 1.1 | I feel emotionally drained by my digital creative writing coursework. |  |  |  |  |  |  |
| 1.2 | I feel used up at the end of a day involving digital creative writing tasks. |  |  |  |  |  |  |
| 1.3 | I feel fatigued when I face another day of digital creative writing work. |  |  |  |  |  |  |
| 1.4 | Working on creative writing assignments using digital tools all day is a strain for me. |  |  |  |  |  |  |
| 1.5 | I feel burned out from my digital creative writing studies. |  |  |  |  |  |  |
| 1.6 | I feel like my creative energy is depleted due to the digital demands of my writing courses. |  |  |  |  |  |  |

**Part 2: Cynicism/Detachment related to Digital Creative Writing Learning**

| No. | Statement | Never | Rarely | Sometimes | Often | Very Often | Always |
| --- | --- | --- | --- | --- | --- | --- | --- |
| 2.1 | I have become less interested in my digital creative writing studies since I started them. |  |  |  |  |  |  |
| 2.2 | I have become more cynical about the usefulness of digital tools for enhancing my creative writing. |  |  |  |  |  |  |
| 2.3 | I doubt the significance of using these digital platforms for my creative writing development. |  |  |  |  |  |  |
| 2.4 | I feel less enthusiastic about participating in online creative writing activities than I used to. |  |  |  |  |  |  |
| 2.5 | I just want to complete my digital creative writing tasks without putting in much thought or effort. |  |  |  |  |  |  |

**Part 3: Reduced Academic Efficacy/Accomplishment in Digital Creative Writing**

| No. | Statement | Never | Rarely | Sometimes | Often | Very Often | Always |
| --- | --- | --- | --- | --- | --- | --- | --- |
| 3.1 | I feel I am not as effective in my digital creative writing tasks as I used to be. |  |  |  |  |  |  |
| 3.2 | I feel I am not accomplishing much in my digital creative writing studies. |  |  |  |  |  |  |
| 3.3 | I do not feel I am making a significant contribution to collaborative creative writing projects online. |  |  |  |  |  |  |
| 3.4 | I am not confident in my ability to meet the demands of digital creative writing assignments. |  |  |  |  |  |  |
| 3.5 | I feel my skills in creative writing are not improving despite using these digital tools/platforms. |  |  |  |  |  |  |

**Instrument 3: Creative Writing Skills Assessment Rubric**

| Criteria | Level 1: Needs Significant Development (1-2 points) | Level 2: Developing (3-4 points) | Level 3: Proficient (5-6 points) | Level 4: Advanced (7-8 points) | Score |
| --- | --- | --- | --- | --- | --- |
| **Originality & Ideas** | Ideas are cliché, predictable, or underdeveloped. Little evidence of creative thought. | Some original ideas present, but may lack depth or rely on common tropes. | Ideas are generally original and thoughtfully developed. Shows good creative thinking. | Ideas are highly original, insightful, and imaginatively developed. Demonstrates exceptional creativity. |  |
| **Coherence & Unity** | Writing lacks a clear focus. Ideas are disjointed and connections are unclear. | Writing has a general focus, but may have some digressions or unclear connections. | Writing is focused and ideas are logically connected. A clear sense of unity is present. | Writing is exceptionally focused, with seamless transitions and a strong, cohesive argument/narrative. |  |
| **Descriptive Language & Imagery** | Language is vague, generic, or imprecise. Little use of sensory details or imagery. | Some use of descriptive language and imagery, but may be inconsistent or not very vivid. | Language is generally precise, vivid, and engaging. Good use of sensory details and imagery. | Language is exceptionally vivid, precise, and evocative. Masterful use of sensory details and imagery. |  |
| **Narrative Structure/ Organization** | Structure is confusing or absent. Plot (if applicable) is poorly developed. Organization of ideas is weak. | Basic structure is evident but may have flaws in pacing, plot development, or logical flow of ideas. | Structure is clear and effective. Plot (if applicable) is well-paced and developed. Ideas are well-organized. | Structure is sophisticated and highly effective, enhancing the impact of the narrative/ideas. Excellent control of pacing and development. |  |
| **Voice & Tone** | Voice is flat, inauthentic, or inappropriate for the piece. Tone is inconsistent or unclear. | Voice is emerging but may lack distinctiveness or consistency. Tone is generally appropriate but may waver. | Voice is distinct, engaging, and appropriate. Tone is consistent and contributes to the piece's effectiveness. | Voice is exceptionally compelling, authentic, and memorable. Tone is masterfully controlled and enhances meaning. |  |
| **Mechanics (Grammar, Spelling, Punctuation)** | Numerous errors in grammar, spelling, and punctuation significantly impede understanding. | Several errors in mechanics are present, sometimes distracting the reader or causing minor confusion. | Few, minor errors in mechanics that do not significantly detract from readability. | Virtually free of errors in grammar, spelling, and punctuation. Demonstrates strong command of conventions. |  |
| **Overall Impact** | Little to no impact on the reader. Fails to engage or convey meaning effectively. | Some impact on the reader, but engagement or clarity may be limited. | Has a clear impact on the reader. Engages and conveys meaning effectively. | Has a powerful and memorable impact on the reader. Exceptionally engaging and meaningful. |  |
|  |  |  |  | **Total Score:** |  |

**Instrument 4: Semi-Structured Interview Protocol**

Interview Guide: Student Experiences with Metaverse-based Creative Writing

Introduction:

"Thank you for agreeing to participate in this interview. The purpose of this conversation is to understand your experiences with the recent Metaverse-based activities for English creative writing. Your honest feedback is valuable. This interview will take approximately [duration] minutes. Your responses will be kept confidential and anonymized in any reports. Do you have any questions before we begin? May I have your permission to audio-record this interview for transcription purposes?"

Part 1: General Perceptions of the Metaverse Environment for Creative Writing

Overall, what was your general impression of using the Metaverse for your creative writing activities?

What were some of the first things you noticed or felt when you started using the Metaverse environment for these tasks?

How did learning creative writing in the Metaverse compare to learning it through traditional classroom methods you've experienced before? What were the main differences for you?

Part 2: Cognitive Engagement

4. How did the Metaverse environment affect your ability to concentrate on the creative writing tasks and instruction? (Probe: easier/harder to focus, distractions, immersion)

5. Did you feel the Metaverse encouraged you to think more deeply or differently about creative writing concepts (like story structure, character, setting)? If so, how?

6. Were there any specific features or activities in the Metaverse that made you feel more mentally involved or challenged in a good way? Can you describe them?

7. Were there any aspects of the Metaverse environment that you found made it difficult to engage cognitively or process information effectively?

Part 3: Development of Creative Writing Skills

8. Do you feel that participating in the Metaverse activities had any impact on your creative writing skills (e.g., generating ideas, developing characters, describing settings, structuring stories)? Can you give specific examples?

9. What aspects of the Metaverse environment, if any, do you think were most helpful for developing your creative writing?

10. What aspects, if any, were least helpful or perhaps hindered your creative writing development?

11. Did the Metaverse environment inspire you creatively in any new or unexpected ways?

Part 4: Digital Burnout

12. When using the Metaverse for these creative writing activities, how did it affect your energy levels? Did you feel more energized, or more tired/drained compared to other digital learning tools you use?

13. Did you experience any feelings of fatigue, frustration, or being overwhelmed specifically related to using the Metaverse for these tasks? Can you describe what that was like?

14. Compared to typical screen-based learning (e.g., video lectures, online readings), did the Metaverse experience feel more or less mentally exhausting for creative writing work? Why do you think that is?

15. Were there any features of the Metaverse that you think helped to reduce feelings of digital fatigue or burnout? Or any that contributed to it?

Part 5: Specific Features and Experiences

16. What specific features of the Metaverse platform (e.g., avatars, 3D spaces, interactive tools, ability to collaborate with others) did you find most impactful, either positively or negatively, on your learning and well-being?

17. Can you describe a particularly memorable positive experience you had during the Metaverse creative writing activities? What made it positive?

18. Can you describe any challenging or negative experiences you encountered? What made them challenging?

19. If you could change or improve anything about the Metaverse-based creative writing activities, what would it be?

Conclusion:

20. Is there anything else you would like to share about your experience with using the Metaverse for creative writing, or any aspect we haven't covered that you think is important?

"Thank you very much for your time and insightful responses. Your feedback is greatly appreciated."
