# Supplementary material for: The Potential of a FrameVR.io Metaverse Environment to Enhance Cognitive Engagement, Reduce Digital Burnout, and Develop Creative Writing Skills
Source: Research Square preprint supplement (doi:10.21203/rs.3.rs-8831860/v1), 2026-02-17
Supplement: Supplementary file 6 [file fe4470ec37dec3c9581fee1d.xlsx]

## Sheet: Sheet2
Group	Dimension 1: Attentional Allocation & Cognitive Focus in Creative Writing	Dimension 2: Metacognitive Self-Regulation in Creative Writing Development	Dimension 3: Active Scholarly Participation & Collaborative Interaction in Creative	Dimension 4: Propensity for Creative Challenge & Mastery Orientation in Writing	Dimension 5: Cognitive Effort Investment & Persistence in Creative Writing	قبلي Cognitive Engagement	Dimension 1: Attentional Allocation & Cognitive Focus in Creative Writing	Dimension 2: Metacognitive Self-Regulation in Creative Writing Development	Dimension 3: Active Scholarly Participation & Collaborative Interaction in Creative	Dimension 4: Propensity for Creative Challenge & Mastery Orientation in Writing	Dimension 5: Cognitive Effort Investment & Persistence in Creative Writing	بعدي Cognitive Engagement	Part 1: Emotional Exhaustion related to Digital Creative Writing Work	Part 2: Cynicism/Detachment related to Digital Creative Writing Learning	Part 3: Reduced Academic Efficacy/Accomplishment in Digital Creative Writing	Instrument 2 – Digital Burnout قبلي	Part 1: Emotional Exhaustion related to Digital Creative Writing Work	Part 2: Cynicism/Detachment related to Digital Creative Writing Learning	Part 3: Reduced Academic Efficacy/Accomplishment in Digital Creative Writing	Instrument 2 – Digital Burnout بعدي	Originality	Coherence	Imagery	Structure	Voice	Mechanics	Impact	ككل قبلي – Creative Writing Rubric	Originality	Coherence	Imagery	Structure	Voice	Mechanics	Impact	ككل بعدي – Creative Writing Rubric
1	18	22	16	19	19	94	19	24	18	21	18	100	17	13	14	44	21	18	19	58	3	4	2	3	4	3	3	22	3	4	3	3	3	3	3	22
1	16	21	15	18	18	88	19	23	17	20	18	97	16	14	14	44	21	18	18	57	4	3	3	4	3	2	4	23	4	4	3	4	3	3	4	25
1	19	22	16	20	19	96	20	23	17	21	24	105	16	13	14	43	21	18	18	57	3	4	2	3	3	3	3	21	3	4	3	3	3	3	3	22
1	17	21	16	18	18	90	19	23	16	20	18	96	16	14	14	44	21	18	19	58	4	3	3	4	4	2	4	24	4	4	3	4	3	3	4	25
1	20	22	16	20	18	96	20	23	17	21	24	105	14	13	14	41	21	18	18	57	3	4	2	3	3	3	3	21	3	4	3	3	3	3	3	22
1	18	21	15	18	18	90	19	23	16	20	18	96	16	12	13	41	21	18	18	57	4	4	3	4	3	4	4	26	4	4	3	4	3	3	4	25
1	19	22	16	20	18	95	20	23	17	21	24	105	14	13	12	39	21	18	19	58	3	4	4	3	3	3	3	23	3	4	3	3	3	3	3	22
1	16	20	14	17	18	85	19	23	16	20	18	96	17	11	13	41	21	18	18	57	4	4	3	4	3	2	4	24	4	4	3	4	3	3	4	25
1	19	23	16	20	19	97	20	23	17	21	24	105	16	14	11	41	21	18	18	57	3	3	2	3	4	3	3	21	3	4	3	3	3	3	3	22
1	18	21	15	18	18	90	19	23	16	20	18	96	14	11	14	39	21	18	19	58	3	4	3	3	3	3	3	22	3	4	3	3	3	3	3	22
1	19	22	16	19	20	96	20	23	17	21	24	105	16	15	14	45	21	18	18	57	4	4	4	4	3	2	4	25	4	4	3	4	3	3	4	25
1	16	20	14	17	18	85	19	23	16	20	18	96	17	14	14	45	21	18	19	58	3	4	3	3	3	3	3	22	3	4	3	3	3	3	3	22
1	18	22	16	20	19	95	20	23	17	21	24	105	15	12	14	41	21	18	18	57	4	4	3	4	3	3	4	25	4	4	3	4	3	3	4	25
1	17	20	15	17	18	87	19	23	16	20	18	96	15	12	14	41	21	18	18	57	3	4	4	3	4	3	3	24	3	4	3	3	3	3	3	22
1	20	22	16	20	18	96	20	23	17	21	24	105	17	11	14	42	21	18	19	58	4	4	3	4	3	3	4	25	4	4	3	4	3	3	4	25
1	18	22	16	19	19	94	19	23	16	20	18	96	17	13	13	43	21	18	18	57	4	3	3	4	3	4	4	25	4	4	3	4	3	3	4	25
1	16	21	15	18	18	88	20	23	17	21	24	105	17	13	12	42	21	18	19	58	3	4	2	3	3	3	3	21	3	4	3	3	3	3	3	22
1	19	22	16	20	19	96	19	23	16	20	18	96	17	15	13	45	21	18	18	57	4	4	3	4	3	3	4	25	4	4	3	4	3	3	4	25
1	17	21	16	18	18	90	20	23	17	21	24	105	16	11	11	38	21	18	18	57	3	4	3	3	4	3	3	23	3	4	3	3	3	3	3	22
1	20	22	16	20	18	96	19	23	16	20	18	96	17	14	14	45	21	18	19	58	4	4	3	4	3	3	4	25	4	4	3	4	3	3	4	25
1	18	21	15	18	18	90	20	23	17	21	24	105	17	14	14	45	21	18	18	57	3	4	3	3	3	4	3	23	3	4	3	3	3	3	3	22
1	19	22	16	20	18	95	19	23	16	20	18	96	16	12	15	43	15	12	12	39	4	4	3	4	3	3	4	25	4	4	3	4	3	3	4	25
1	16	20	14	17	18	85	20	23	17	21	24	105	16	13	14	43	15	12	11	38	3	4	3	3	3	3	3	22	3	4	3	3	3	3	3	22
1	19	23	16	20	19	97	19	23	16	20	18	96	16	14	14	44	15	12	12	39	4	4	3	4	4	3	4	26	4	4	3	4	3	3	4	25
1	18	21	15	18	18	90	20	23	17	21	24	105	14	13	14	41	15	12	12	39	3	4	3	3	3	3	3	22	3	4	3	3	3	3	3	22
1	19	22	16	19	20	96	19	23	16	20	18	96	16	14	14	44	15	12	11	38	4	4	3	4	2	4	4	25	4	4	3	4	3	3	4	25
1	16	20	14	17	18	85	20	23	17	21	24	105	14	14	13	41	15	12	12	39	3	4	3	3	3	3	3	22	3	4	3	3	3	3	3	22
1	18	22	16	20	19	95	19	23	16	20	18	96	17	13	12	42	15	12	12	39	4	4	3	4	3	3	4	25	3	4	3	3	3	3	3	22
1	17	20	15	17	18	87	20	23	17	21	24	105	16	12	13	41	15	12	11	38	3	4	3	3	3	3	3	22	4	4	3	4	3	3	4	25
1	20	22	16	20	18	96	19	23	16	20	18	96	16	13	11	40	15	12	12	39	4	4	3	4	3	3	4	25	3	4	3	3	3	3	3	22
1	18	21	15	18	18	90	20	23	17	21	24	105	16	11	14	41	15	12	11	38	3	4	3	3	3	3	3	22	3	4	3	3	3	3	3	22
1	19	22	16	19	20	96	19	23	16	20	18	96	14	13	14	41	15	12	12	39	3	4	3	3	3	3	3	22	4	4	3	4	3	3	4	25
1	16	20	14	17	18	85	20	23	17	21	24	105	16	14	15	45	15	12	12	39	4	4	3	4	3	3	4	25	3	4	3	3	3	3	3	22
1	18	22	16	20	19	95	20	23	17	21	24	105	14	15	14	43	15	12	11	38	3	4	3	3	3	2	3	21	4	4	3	4	3	3	4	25
1	17	20	15	17	18	87	19	23	16	20	18	96	17	14	12	43	15	12	12	39	4	4	3	4	3	3	4	25	5	4	5	5	3	5	5	32
2	18	22	16	19	17	92	27	30	22	26	24	129	16	12	12	40	9	8	9	26	3	4	3	3	3	3	3	22	4	4	5	4	4	5	4	30
2	18	20	16	19	18	91	26	29	21	25	24	125	17	12	13	42	9	8	8	25	4	4	3	4	3	3	4	25	5	4	5	5	4	5	5	33
2	18	22	16	19	19	94	26	30	22	26	24	128	16	13	13	42	9	8	8	25	3	4	3	3	3	2	3	21	4	4	5	4	4	5	4	30
2	18	21	16	19	18	92	26	30	22	26	30	134	16	13	16	45	9	8	9	26	4	4	3	4	3	3	4	25	5	4	5	5	4	5	5	33
2	18	22	16	19	19	94	27	30	22	26	24	129	16	16	15	47	9	8	8	25	3	4	3	3	3	3	3	22	5	4	5	5	4	5	5	33
2	18	21	16	19	18	92	26	29	21	25	24	125	14	14	14	42	9	8	8	25	3	4	3	3	3	3	3	22	4	4	5	4	4	5	4	30
2	18	22	14	19	18	91	26	30	22	26	24	128	16	14	14	44	9	8	9	26	4	4	3	4	3	2	4	24	5	4	5	5	4	5	5	33
2	18	21	16	19	18	92	26	30	22	26	30	134	14	14	14	42	9	8	8	25	3	4	3	3	3	3	3	22	4	4	5	4	4	5	4	30
2	18	22	14	19	18	91	27	30	22	26	24	129	17	14	14	45	9	8	8	25	4	4	3	4	3	3	4	25	5	4	5	5	4	5	5	33
2	18	21	16	19	18	92	26	29	21	25	24	125	16	13	13	42	9	8	9	26	3	4	3	3	3	3	3	22	5	4	5	5	4	5	5	33
2	18	22	16	19	18	93	26	30	22	26	24	128	14	12	12	38	9	8	8	25	4	4	3	4	3	3	4	25	4	4	5	4	4	5	4	30
2	18	21	14	19	18	90	26	30	22	26	30	134	16	13	13	42	9	8	9	26	3	4	3	3	3	3	3	22	5	4	5	5	4	5	5	33
2	18	22	16	19	18	93	27	30	22	26	24	129	17	11	11	39	9	8	8	25	4	4	3	4	3	3	4	25	4	4	5	4	4	5	4	30
2	18	22	16	19	18	93	26	29	21	25	24	125	16	14	14	44	9	8	8	25	3	4	3	3	3	3	3	22	5	4	5	5	4	5	5	33
2	18	22	14	19	18	91	26	30	22	26	24	128	16	14	14	44	9	8	9	26	3	4	3	3	3	3	3	22	4	4	5	4	4	5	4	30
2	18	21	16	19	17	91	26	30	22	26	30	134	16	15	15	46	9	8	8	25	4	4	3	4	3	3	4	25	5	4	5	5	4	5	5	33
2	18	22	16	19	18	93	27	30	22	26	24	129	14	14	14	42	9	8	9	26	3	4	3	3	3	3	3	22	4	4	5	4	4	5	4	30
2	18	22	14	19	18	91	26	29	21	25	24	125	16	14	12	42	9	8	8	25	4	4	3	4	3	3	4	25	5	4	5	5	4	5	5	33
2	18	21	16	19	18	92	26	30	22	26	24	128	14	14	12	40	9	8	8	25	3	4	3	3	3	3	3	22	5	4	5	5	4	5	5	33
2	18	22	14	19	19	92	26	30	22	26	30	134	17	14	13	44	9	8	9	26	4	4	3	4	3	3	4	25	5	4	5	5	4	5	5	33
2	18	21	16	19	18	92	27	30	22	26	24	129	17	14	13	44	9	8	8	25	3	4	3	3	3	3	3	22	4	4	5	4	4	5	4	30
2	18	22	14	19	18	91	26	29	21	25	24	125	17	13	16	46	9	8	8	25	4	4	3	4	3	3	4	25	5	4	5	5	4	5	5	33
2	18	20	13	19	18	88	26	30	22	26	24	128	16	12	15	43	9	8	9	26	3	4	3	3	3	3	3	22	4	4	5	4	4	5	4	30
2	18	22	16	19	18	93	26	30	22	26	30	134	16	13	14	43	9	8	8	25	4	4	3	4	3	3	4	25	5	4	5	5	4	5	5	33
2	18	22	13	19	19	91	27	30	22	26	24	129	16	11	14	41	9	8	8	25	3	4	3	3	3	3	3	22	4	4	5	4	4	5	4	30
2	18	20	16	19	18	91	26	29	21	25	24	125	14	14	14	42	9	8	9	26	3	4	3	3	3	3	3	22	5	4	5	5	4	5	5	33
2	18	22	16	19	18	93	26	30	22	26	24	128	16	14	14	44	9	8	8	25	4	4	3	4	3	3	4	25	4	4	5	4	4	5	4	30
2	18	20	13	19	18	88	26	30	22	26	30	134	14	15	13	42	9	8	8	25	3	4	3	3	3	3	3	22	5	4	5	5	4	5	5	33
2	18	21	16	19	19	93	27	30	22	26	24	129	17	14	12	43	9	8	9	26	3	4	3	3	3	3	3	22	5	4	5	5	4	5	5	33
2	18	22	16	19	18	93	26	29	21	25	24	125	16	12	13	41	9	8	8	25	4	4	3	4	3	3	4	25	5	4	5	5	4	5	5	33
2	18	22	13	19	18	90	26	30	22	26	24	128	14	12	11	37	9	8	9	26	3	4	3	3	3	3	3	22	4	4	5	4	4	5	4	30
2	18	22	16	19	18	93	26	30	22	26	30	134	16	13	14	43	9	8	8	25	4	4	3	4	3	3	4	25	5	4	5	5	4	5	5	33
2	18	22	13	19	19	91	27	30	22	26	24	129	17	13	14	44	9	8	8	25	3	4	3	3	3	3	3	22	4	4	5	4	4	5	4	30
2	18	22	16	19	19	94	26	29	21	25	24	125	15	16	15	46	9	8	9	26	4	4	3	4	3	3	4	25	5	4	5	5	4	5	5	33
2	18	22	13	19	18	90	26	30	22	26	24	128	15	15	14	44	9	8	8	25	3	4	3	3	3	3	3	22	5	4	5	5	4	5	5	33

## Sheet: Sheet1
Group	Time	CE1	CE2	CE3	CE4	CE5	CE6	Dimension 1: Attentional Allocation & Cognitive Focus in Creative Writing	CE7	CE8	CE9	CE10	CE11	CE12	CE13	Dimension 2: Metacognitive Self-Regulation in Creative Writing Development	CE14	CE15	CE16	CE17	CE18	Dimension 3: Active Scholarly Participation & Collaborative Interaction in Creative	CE19	CE20	CE21	CE22	CE23	CE24	Dimension 4: Propensity for Creative Challenge & Mastery Orientation in Writing	CE25	CE26	CE27	CE28	CE29	CE30	Dimension 5: Cognitive Effort Investment & Persistence in Creative Writing	قبلي Cognitive Engagement	group	CE1	CE2	CE3	CE4	CE5	CE6	Dimension 1: Attentional Allocation & Cognitive Focus in Creative Writing	CE7	CE8	CE9	CE10
Control	Pre	3	3	4	3	2	3	18	4	3	3	4	3	3	2	22	3	4	3	3	3	16	4	3	2	3	4	3	19	3	4	3	3	3	3	19	94	Control	2	3	4	4	3	3	19	4	3	4	4
Control	Pre	2	3	3	3	3	2	16	3	4	3	3	2	3	3	21	3	3	4	2	3	15	3	3	3	2	3	4	18	3	3	3	3	3	3	18	88	Control	3	3	3	4	3	3	19	3	4	3	4
Control	Pre	3	4	3	3	3	3	19	3	3	4	3	3	3	3	22	4	3	3	3	3	16	4	3	3	3	3	4	20	3	3	3	3	3	4	19	96	Control	3	4	4	3	3	3	20	3	4	4	3
Control	Pre	3	3	3	2	3	3	17	4	3	3	3	3	3	2	21	3	4	3	3	3	16	3	3	2	3	3	4	18	3	3	3	3	3	3	18	90	Control	3	3	4	3	3	3	19	4	3	4	3
Control	Pre	4	3	3	3	3	4	20	3	3	4	3	3	3	3	22	3	4	3	3	3	16	4	3	3	3	3	4	20	3	3	3	3	3	3	18	96	Control	3	4	4	3	3	3	20	3	4	4	3
Control	Pre	3	3	3	3	3	3	18	3	3	3	3	3	3	3	21	3	3	3	3	3	15	3	3	3	3	3	3	18	3	3	3	3	3	3	18	90	Control	3	3	4	3	3	3	19	4	3	4	3
Control	Pre	3	4	3	3	3	3	19	4	3	3	3	3	3	3	22	4	3	3	3	3	16	4	3	3	3	3	4	20	3	3	3	3	3	3	18	95	Control	3	4	4	3	3	3	20	3	4	4	3
Control	Pre	2	3	3	3	2	3	16	3	3	3	3	2	3	3	20	3	3	3	2	3	14	3	3	3	2	3	3	17	3	3	3	3	3	3	18	85	Control	3	3	4	3	3	3	19	4	3	4	3
Control	Pre	3	3	4	3	3	3	19	4	3	3	4	3	3	3	23	3	4	3	3	3	16	4	3	3	3	3	4	20	3	3	3	3	3	4	19	97	Control	3	4	4	3	3	3	20	3	4	4	3
Control	Pre	3	3	3	3	3	3	18	3	3	3	3	3	3	3	21	3	3	3	3	3	15	3	3	3	3	3	3	18	3	3	3	3	3	3	18	90	Control	3	3	4	3	3	3	19	4	3	4	3
Control	Pre	3	4	3	3	3	3	19	3	4	3	3	3	3	3	22	3	4	3	3	3	16	3	4	3	3	3	3	19	4	3	3	3	3	4	20	96	Control	3	4	4	3	3	3	20	3	4	4	3
Control	Pre	2	3	3	3	2	3	16	3	3	3	3	2	3	3	20	3	3	3	2	3	14	3	3	3	2	3	3	17	3	3	3	3	3	3	18	85	Control	3	3	4	3	3	3	19	4	3	4	3
Control	Pre	3	3	3	3	3	3	18	3	3	4	3	3	3	3	22	4	3	3	3	3	16	4	3	3	3	3	4	20	3	3	3	3	3	4	19	95	Control	3	4	4	3	3	3	20	3	4	4	3
Control	Pre	3	3	3	2	3	3	17	3	3	3	3	3	3	2	20	3	3	3	3	3	15	3	3	2	3	3	3	17	3	3	3	3	3	3	18	87	Control	3	3	4	3	3	3	19	4	3	4	3
Control	Pre	4	3	3	3	3	4	20	3	3	4	3	3	3	3	22	3	4	3	3	3	16	4	3	3	3	3	4	20	3	3	3	3	3	3	18	96	Control	3	4	4	3	3	3	20	3	4	4	3
Control	Pre	3	3	4	3	2	3	18	4	3	3	4	3	3	2	22	3	4	3	3	3	16	4	3	2	3	4	3	19	3	4	3	3	3	3	19	94	Control	3	3	4	3	3	3	19	4	3	4	3
Control	Pre	2	3	3	3	3	2	16	3	4	3	3	2	3	3	21	3	3	4	2	3	15	3	3	3	2	3	4	18	3	3	3	3	3	3	18	88	Control	3	4	4	3	3	3	20	3	4	4	3
Control	Pre	3	4	3	3	3	3	19	3	3	4	3	3	3	3	22	4	3	3	3	3	16	4	3	3	3	3	4	20	3	3	3	3	3	4	19	96	Control	3	3	4	3	3	3	19	4	3	4	3
Control	Pre	3	3	3	2	3	3	17	4	3	3	3	3	3	2	21	3	4	3	3	3	16	3	3	2	3	3	4	18	3	3	3	3	3	3	18	90	Control	3	4	4	3	3	3	20	3	4	4	3
Control	Pre	4	3	3	3	3	4	20	3	3	4	3	3	3	3	22	3	4	3	3	3	16	4	3	3	3	3	4	20	3	3	3	3	3	3	18	96	Control	3	3	4	3	3	3	19	4	3	4	3
Control	Pre	3	3	3	3	3	3	18	3	3	3	3	3	3	3	21	3	3	3	3	3	15	3	3	3	3	3	3	18	3	3	3	3	3	3	18	90	Control	3	4	4	3	3	3	20	3	4	4	3
Control	Pre	3	4	3	3	3	3	19	4	3	3	3	3	3	3	22	4	3	3	3	3	16	4	3	3	3	3	4	20	3	3	3	3	3	3	18	95	Control	3	3	4	3	3	3	19	4	3	4	3
Control	Pre	2	3	3	3	2	3	16	3	3	3	3	2	3	3	20	3	3	3	2	3	14	3	3	3	2	3	3	17	3	3	3	3	3	3	18	85	Control	3	4	4	3	3	3	20	3	4	4	3
Control	Pre	3	3	4	3	3	3	19	4	3	3	4	3	3	3	23	3	4	3	3	3	16	4	3	3	3	3	4	20	3	3	3	3	3	4	19	97	Control	3	3	4	3	3	3	19	4	3	4	3
Control	Pre	3	3	3	3	3	3	18	3	3	3	3	3	3	3	21	3	3	3	3	3	15	3	3	3	3	3	3	18	3	3	3	3	3	3	18	90	Control	3	4	4	3	3	3	20	3	4	4	3
Control	Pre	3	4	3	3	3	3	19	3	4	3	3	3	3	3	22	3	4	3	3	3	16	3	4	3	3	3	3	19	4	3	3	3	3	4	20	96	Control	3	3	4	3	3	3	19	4	3	4	3
Control	Pre	2	3	3	3	2	3	16	3	3	3	3	2	3	3	20	3	3	3	2	3	14	3	3	3	2	3	3	17	3	3	3	3	3	3	18	85	Control	3	4	4	3	3	3	20	3	4	4	3
Control	Pre	3	3	3	3	3	3	18	3	3	4	3	3	3	3	22	4	3	3	3	3	16	4	3	3	3	3	4	20	3	3	3	3	3	4	19	95	Control	3	3	4	3	3	3	19	4	3	4	3
Control	Pre	3	3	3	2	3	3	17	3	3	3	3	3	3	2	20	3	3	3	3	3	15	3	3	2	3	3	3	17	3	3	3	3	3	3	18	87	Control	3	4	4	3	3	3	20	3	4	4	3
Control	Pre	4	3	3	3	3	4	20	3	3	4	3	3	3	3	22	3	4	3	3	3	16	4	3	3	3	3	4	20	3	3	3	3	3	3	18	96	Control	3	3	4	3	3	3	19	4	3	4	3
Control	Pre	3	3	3	3	3	3	18	3	3	3	3	3	3	3	21	3	3	3	3	3	15	3	3	3	3	3	3	18	3	3	3	3	3	3	18	90	Control	3	4	4	3	3	3	20	3	4	4	3
Control	Pre	3	4	3	3	3	3	19	3	4	3	3	3	3	3	22	3	4	3	3	3	16	3	4	3	3	3	3	19	4	3	3	3	3	4	20	96	Control	3	3	4	3	3	3	19	4	3	4	3
Control	Pre	2	3	3	3	2	3	16	3	3	3	3	2	3	3	20	3	3	3	2	3	14	3	3	3	2	3	3	17	3	3	3	3	3	3	18	85	Control	3	4	4	3	3	3	20	3	4	4	3
Control	Pre	3	3	3	3	3	3	18	3	3	4	3	3	3	3	22	4	3	3	3	3	16	4	3	3	3	3	4	20	3	3	3	3	3	4	19	95	Control	3	4	4	3	3	3	20	3	4	4	3
Control	Pre	3	3	3	2	3	3	17	3	3	3	3	3	3	2	20	3	3	3	3	3	15	3	3	2	3	3	3	17	3	3	3	3	3	3	18	87	Control	3	3	4	3	3	3	19	4	3	4	3
Experimental	Pre	3	3	3	3	3	3	18	3	4	3	3	3	3	3	22	3	4	3	3	3	16	3	3	3	3	4	3	19	3	3	3	3	3	3	18	93	expermental	5	5	4	4	4	5	27	5	4	5	4
Experimental	Pre	3	3	3	3	3	3	18	3	4	3	3	3	3	3	22	3	4	3	3	3	16	3	3	3	3	4	3	19	3	3	3	3	3	3	18	93	expermental	5	4	5	4	4	4	26	4	5	4	4
Experimental	Pre	3	3	3	3	3	3	18	3	4	3	3	3	3	3	22	3	4	3	3	3	16	3	3	3	3	4	3	19	3	3	3	3	3	3	18	93	expermental	5	4	5	4	4	4	26	4	5	4	5
Experimental	Pre	3	3	3	3	3	3	18	3	4	3	3	3	3	3	22	3	4	3	3	3	16	3	3	3	3	4	3	19	3	3	3	3	3	3	18	93	expermental	5	4	4	5	4	4	26	5	4	5	4
Experimental	Pre	3	3	3	3	3	3	18	3	4	3	3	3	3	3	22	3	4	3	3	3	16	3	3	3	3	4	3	19	3	3	3	3	3	3	18	93	expermental	5	5	4	4	4	5	27	5	4	5	4
Experimental	Pre	3	3	3	3	3	3	18	3	4	3	3	3	3	3	22	3	4	3	3	3	16	3	3	3	3	4	3	19	3	3	3	3	3	3	18	93	expermental	5	4	5	4	4	4	26	4	5	4	4
Experimental	Pre	3	3	3	3	3	3	18	3	4	3	3	3	3	3	22	3	4	3	3	3	16	3	3	3	3	4	3	19	3	3	3	3	3	3	18	93	expermental	5	4	5	4	4	4	26	4	5	4	5
Experimental	Pre	3	3	3	3	3	3	18	3	4	3	3	3	3	3	22	3	4	3	3	3	16	3	3	3	3	4	3	19	3	3	3	3	3	3	18	93	expermental	5	4	4	5	4	4	26	5	4	5	4
Experimental	Pre	3	3	3	3	3	3	18	3	4	3	3	3	3	3	22	3	4	3	3	3	16	3	3	3	3	4	3	19	3	3	3	3	3	3	18	93	expermental	5	5	4	4	4	5	27	5	4	5	4
Experimental	Pre	3	3	3	3	3	3	18	3	4	3	3	3	3	3	22	3	4	3	3	3	16	3	3	3	3	4	3	19	3	3	3	3	3	3	18	93	expermental	5	4	5	4	4	4	26	4	5	4	4
Experimental	Pre	3	3	3	3	3	3	18	3	4	3	3	3	3	3	22	3	4	3	3	3	16	3	3	3	3	4	3	19	3	3	3	3	3	3	18	93	expermental	5	4	5	4	4	4	26	4	5	4	5
Experimental	Pre	3	3	3	3	3	3	18	3	4	3	3	3	3	3	22	3	4	3	3	3	16	3	3	3	3	4	3	19	3	3	3	3	3	3	18	93	expermental	5	4	4	5	4	4	26	5	4	5	4
Experimental	Pre	3	3	3	3	3	3	18	3	4	3	3	3	3	3	22	3	4	3	3	3	16	3	3	3	3	4	3	19	3	3	3	3	3	3	18	93	expermental	5	5	4	4	4	5	27	5	4	5	4
Experimental	Pre	3	3	3	3	3	3	18	3	4	3	3	3	3	3	22	3	4	3	3	3	16	3	3	3	3	4	3	19	3	3	3	3	3	3	18	93	expermental	5	4	5	4	4	4	26	4	5	4	4
Experimental	Pre	3	3	3	3	3	3	18	3	4	3	3	3	3	3	22	3	4	3	3	3	16	3	3	3	3	4	3	19	3	3	3	3	3	3	18	93	expermental	5	4	5	4	4	4	26	4	5	4	5
Experimental	Pre	3	3	3	3	3	3	18	3	4	3	3	3	3	3	22	3	4	3	3	3	16	3	3	3	3	4	3	19	3	3	3	3	3	3	18	93	expermental	5	4	4	5	4	4	26	5	4	5	4
Experimental	Pre	3	3	3	3	3	3	18	3	4	3	3	3	3	3	22	3	4	3	3	3	16	3	3	3	3	4	3	19	3	3	3	3	3	3	18	93	expermental	5	5	4	4	4	5	27	5	4	5	4
Experimental	Pre	3	3	3	3	3	3	18	3	4	3	3	3	3	3	22	3	4	3	3	3	16	3	3	3	3	4	3	19	3	3	3	3	3	3	18	93	expermental	5	4	5	4	4	4	26	4	5	4	4
Experimental	Pre	3	3	3	3	3	3	18	3	4	3	3	3	3	3	22	3	4	3	3	3	16	3	3	3	3	4	3	19	3	3	3	3	3	3	18	93	expermental	5	4	5	4	4	4	26	4	5	4	5
Experimental	Pre	3	3	3	3	3	3	18	3	4	3	3	3	3	3	22	3	4	3	3	3	16	3	3	3	3	4	3	19	3	3	3	3	3	3	18	93	expermental	5	4	4	5	4	4	26	5	4	5	4
Experimental	Pre	3	3	3	3	3	3	18	3	4	3	3	3	3	3	22	3	4	3	3	3	16	3	3	3	3	4	3	19	3	3	3	3	3	3	18	93	expermental	5	5	4	4	4	5	27	5	4	5	4
Experimental	Pre	3	3	3	3	3	3	18	3	4	3	3	3	3	3	22	3	4	3	3	3	16	3	3	3	3	4	3	19	3	3	3	3	3	3	18	93	expermental	5	4	5	4	4	4	26	4	5	4	4
Experimental	Pre	3	3	3	3	3	3	18	3	4	3	3	3	3	3	22	3	4	3	3	3	16	3	3	3	3	4	3	19	3	3	3	3	3	3	18	93	expermental	5	4	5	4	4	4	26	4	5	4	5
Experimental	Pre	3	3	3	3	3	3	18	3	4	3	3	3	3	3	22	3	4	3	3	3	16	3	3	3	3	4	3	19	3	3	3	3	3	3	18	93	expermental	5	4	4	5	4	4	26	5	4	5	4
Experimental	Pre	3	3	3	3	3	3	18	3	4	3	3	3	3	3	22	3	4	3	3	3	16	3	3	3	3	4	3	19	3	3	3	3	3	3	18	93	expermental	5	5	4	4	4	5	27	5	4	5	4
Experimental	Pre	3	3	3	3	3	3	18	3	4	3	3	3	3	3	22	3	4	3	3	3	16	3	3	3	3	4	3	19	3	3	3	3	3	3	18	93	expermental	5	4	5	4	4	4	26	4	5	4	4
Experimental	Pre	3	3	3	3	3	3	18	3	4	3	3	3	3	3	22	3	4	3	3	3	16	3	3	3	3	4	3	19	3	3	3	3	3	3	18	93	expermental	5	4	5	4	4	4	26	4	5	4	5
Experimental	Pre	3	3	3	3	3	3	18	3	4	3	3	3	3	3	22	3	4	3	3	3	16	3	3	3	3	4	3	19	3	3	3	3	3	3	18	93	expermental	5	4	4	5	4	4	26	5	4	5	4
Experimental	Pre	3	3	3	3	3	3	18	3	4	3	3	3	3	3	22	3	4	3	3	3	16	3	3	3	3	4	3	19	3	3	3	3	3	3	18	93	expermental	5	5	4	4	4	5	27	5	4	5	4
Experimental	Pre	3	3	3	3	3	3	18	3	4	3	3	3	3	3	22	3	4	3	3	3	16	3	3	3	3	4	3	19	3	3	3	3	3	3	18	93	expermental	5	4	5	4	4	4	26	4	5	4	4
Experimental	Pre	3	3	3	3	3	3	18	3	4	3	3	3	3	3	22	3	4	3	3	3	16	3	3	3	3	4	3	19	3	3	3	3	3	3	18	93	expermental	5	4	5	4	4	4	26	4	5	4	5
Experimental	Pre	3	3	3	3	3	3	18	3	4	3	3	3	3	3	22	3	4	3	3	3	16	3	3	3	3	4	3	19	3	3	3	3	3	3	18	93	expermental	5	4	4	5	4	4	26	5	4	5	4
Experimental	Pre	3	3	3	3	3	3	18	3	4	3	3	3	3	3	22	3	4	3	3	3	16	3	3	3	3	4	3	19	3	3	3	3	3	3	18	93	expermental	5	5	4	4	4	5	27	5	4	5	4
Experimental	Pre	3	3	3	3	3	3	18	3	4	3	3	3	3	3	22	3	4	3	3	3	16	3	3	3	3	4	3	19	3	3	3	3	3	3	18	93	expermental	5	4	5	4	4	4	26	4	5	4	4
Experimental	Pre	3	3	3	3	3	3	18	3	4	3	3	3	3	3	22	3	4	3	3	3	16	3	3	3	3	4	3	19	3	3	3	3	3	3	18	93	expermental	5	4	5	4	4	4	26	4	5	4	5
[truncated: 81 more columns]
